# Supplementary material
Source: PubMed Central journal article supplement (PMC3392703)

**A** Starting location of photoconverted cell(s) within the Pax2a domain (12 hpf):

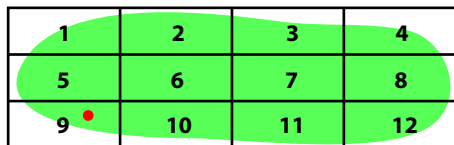

**B** Ending location of photoconverted cell(s) within the otic vesicle (24 hpf):

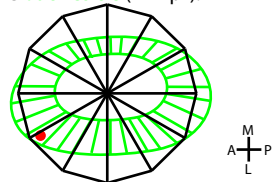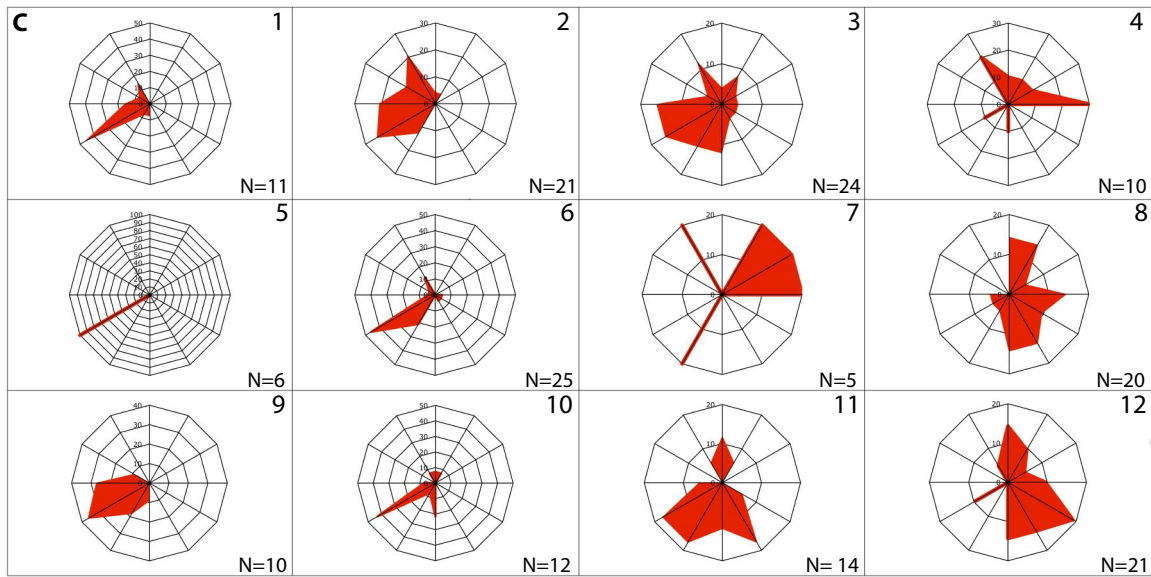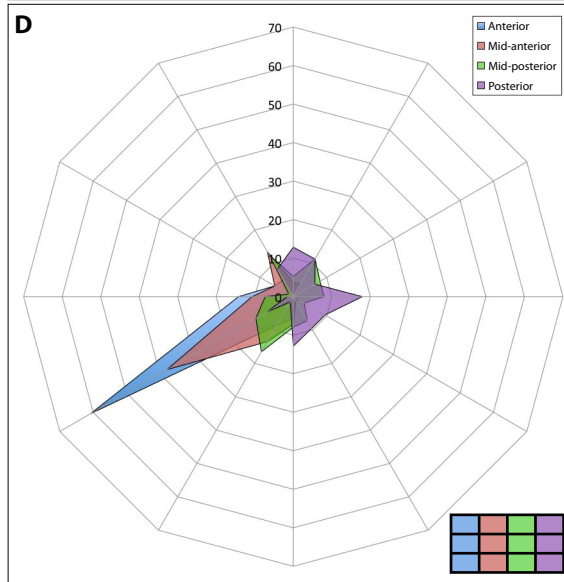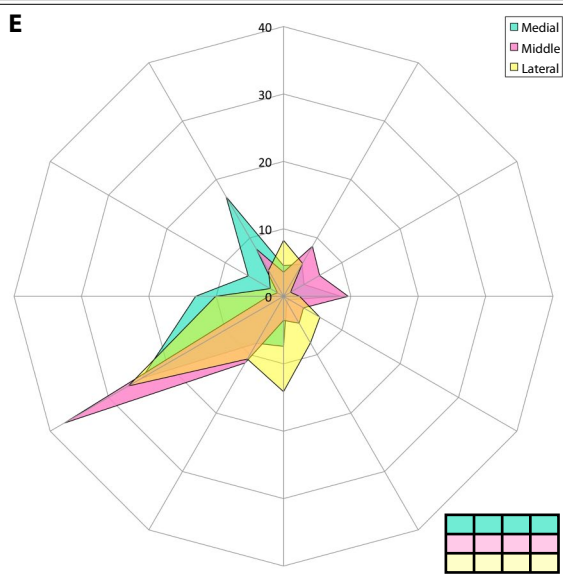

Supplement: supp_139.15.2740_DEV076075-s02.pdf [file supp_139.15.2740_DEV076075-s02.pdf]
