# Supplementary material
Source: PubMed Central journal article supplement (PMC3392703)

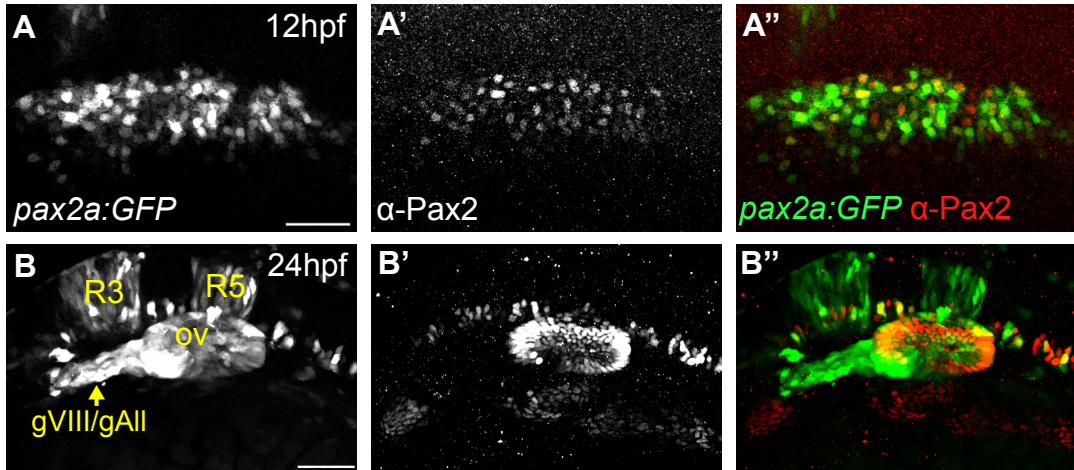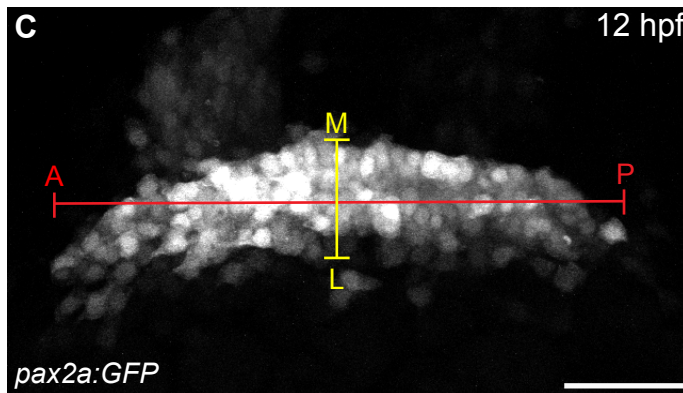

| <b>D</b>         | Ave   | SEM  |
|------------------|-------|------|
| Total GFP+ cells | 107.8 | 2.16 |
| A-P cells        | 26.6  | 0.65 |
| M-L cells        | 5.2   | 0.23 |

Supplement: supp_139.15.2740_DEV076075-s01.pdf [file supp_139.15.2740_DEV076075-s01.pdf]

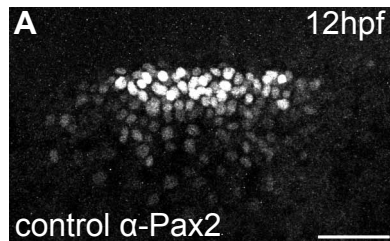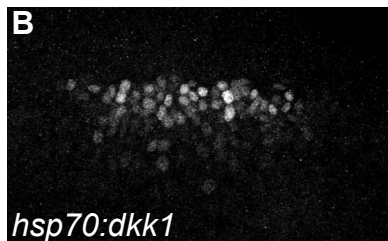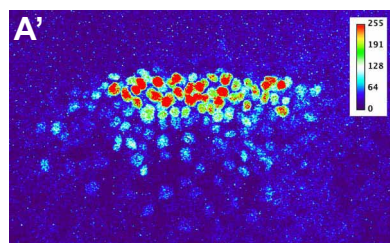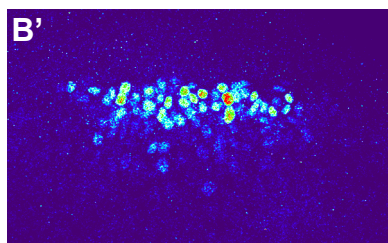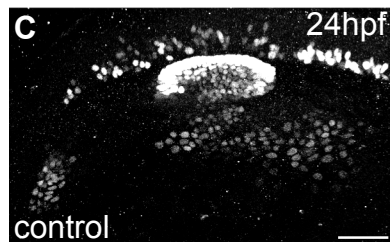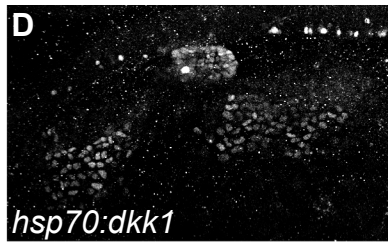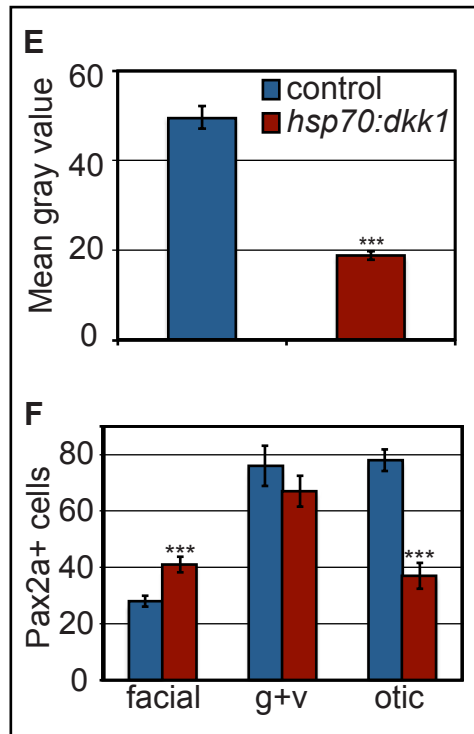

Supplement: supp_139.15.2740_DEV076075-s011.pdf [file supp_139.15.2740_DEV076075-s011.pdf]

fgf 3

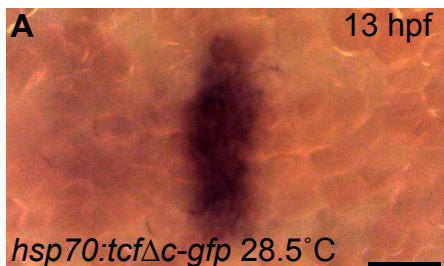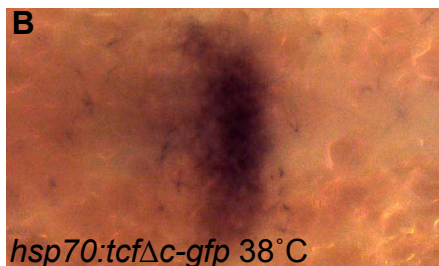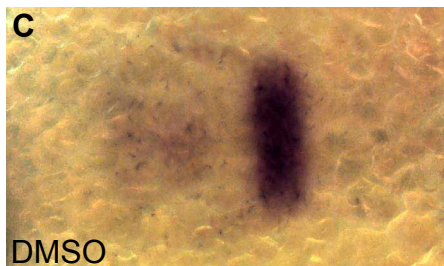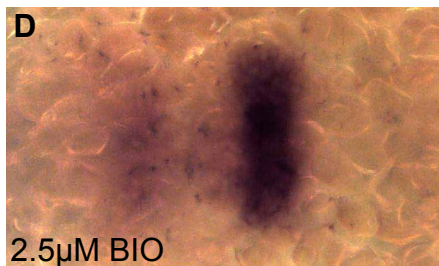

fgf 8

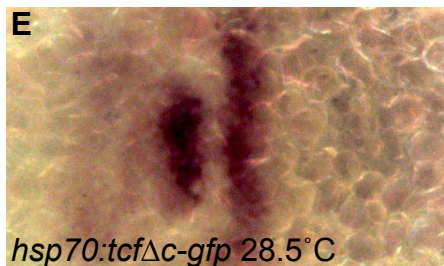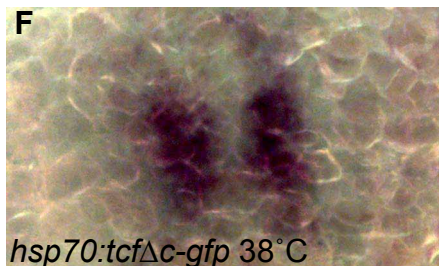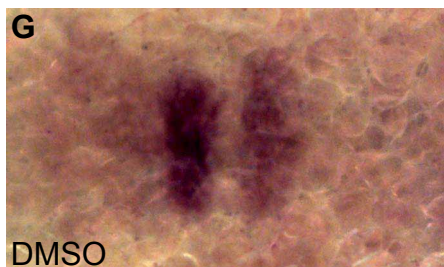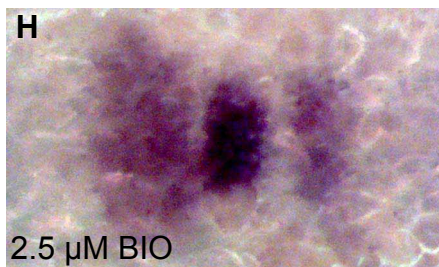

Supplement: supp_139.15.2740_DEV076075-s012.pdf [file supp_139.15.2740_DEV076075-s012.pdf]

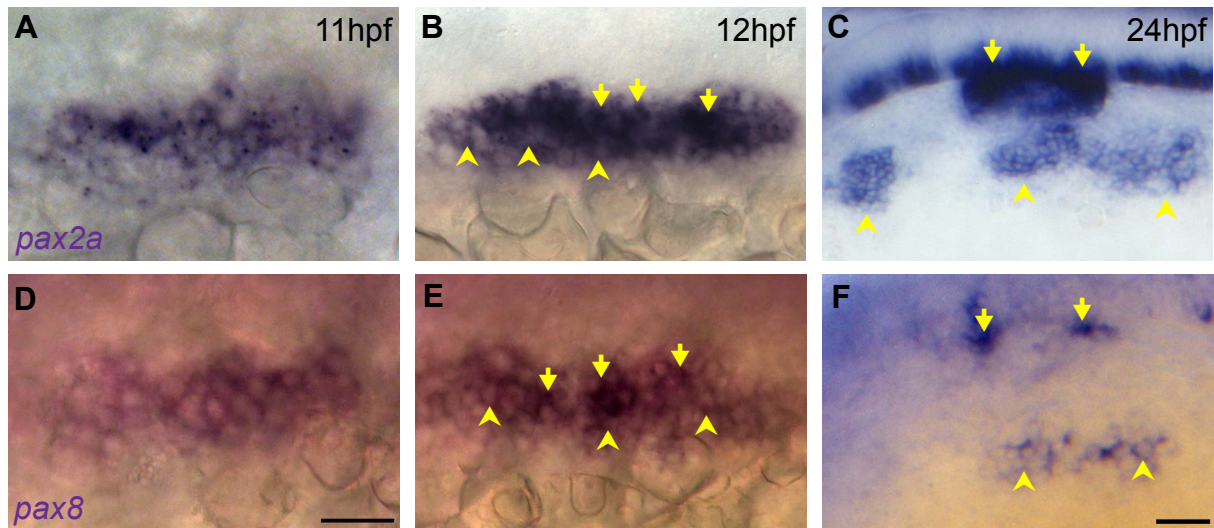

Supplement: supp_139.15.2740_DEV076075-s03.pdf [file supp_139.15.2740_DEV076075-s03.pdf]

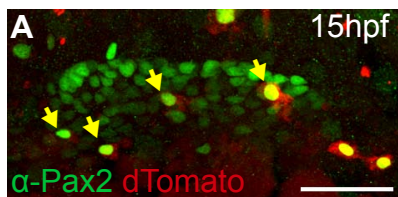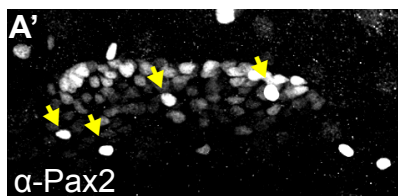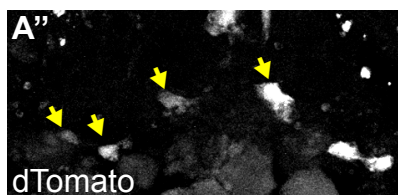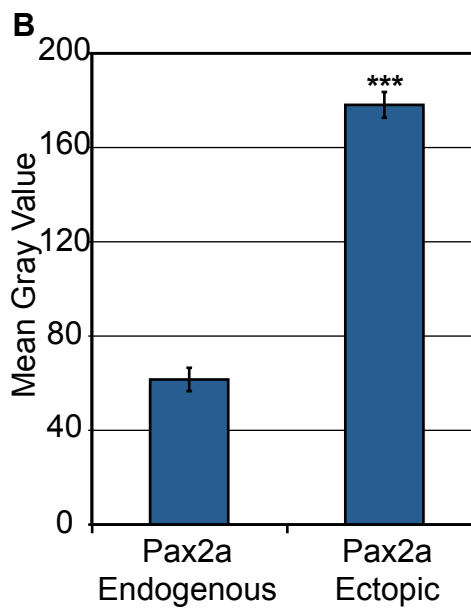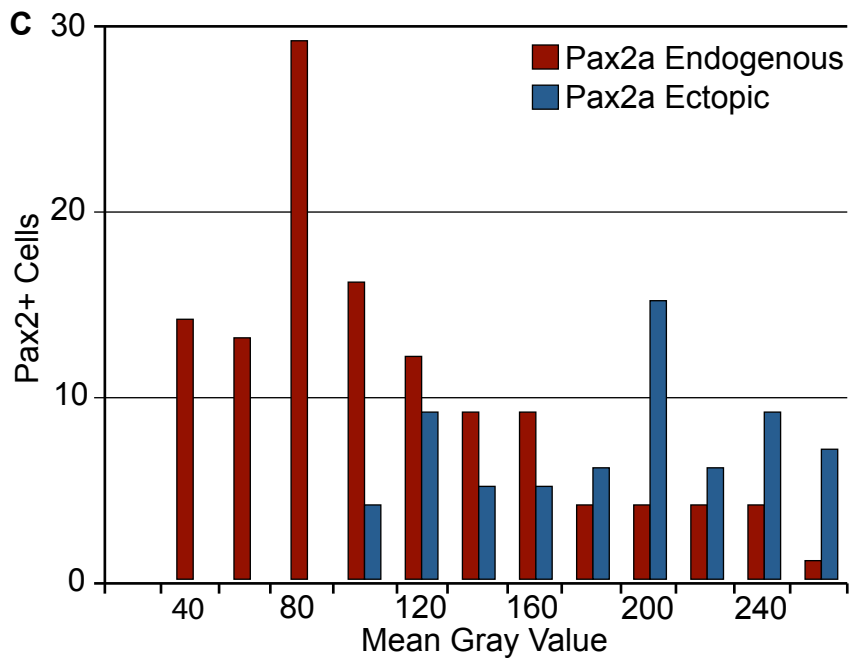

Supplement: supp_139.15.2740_DEV076075-s04.pdf [file supp_139.15.2740_DEV076075-s04.pdf]

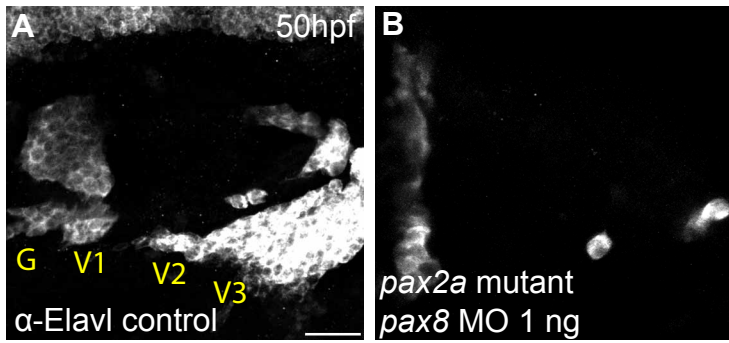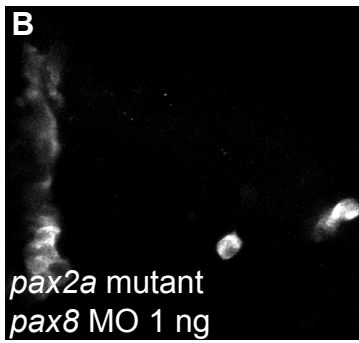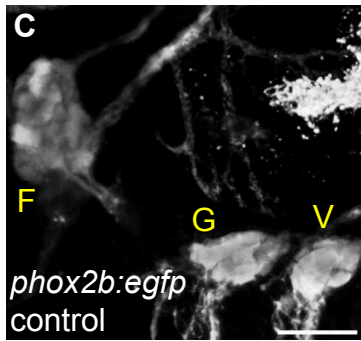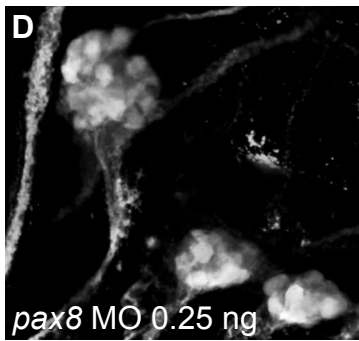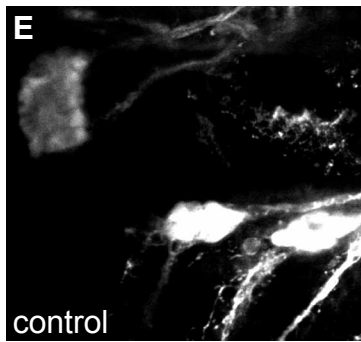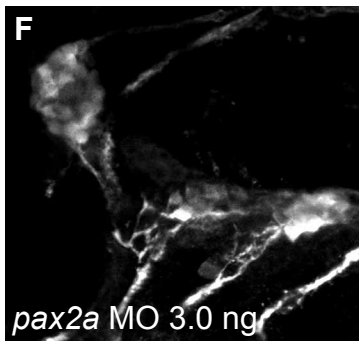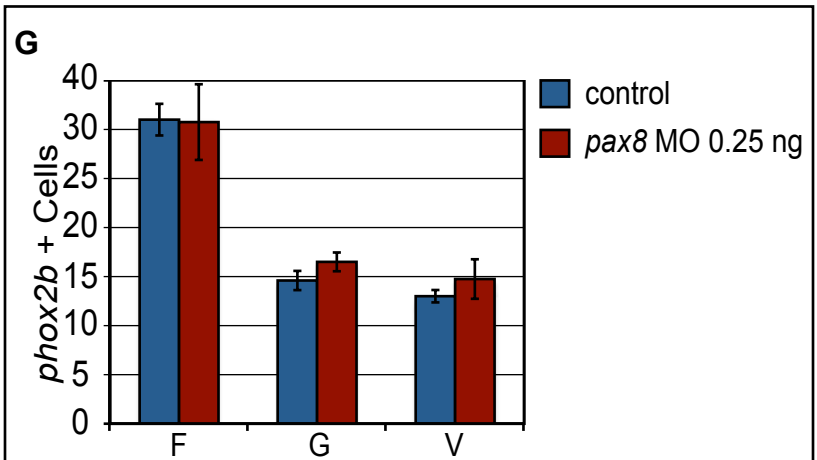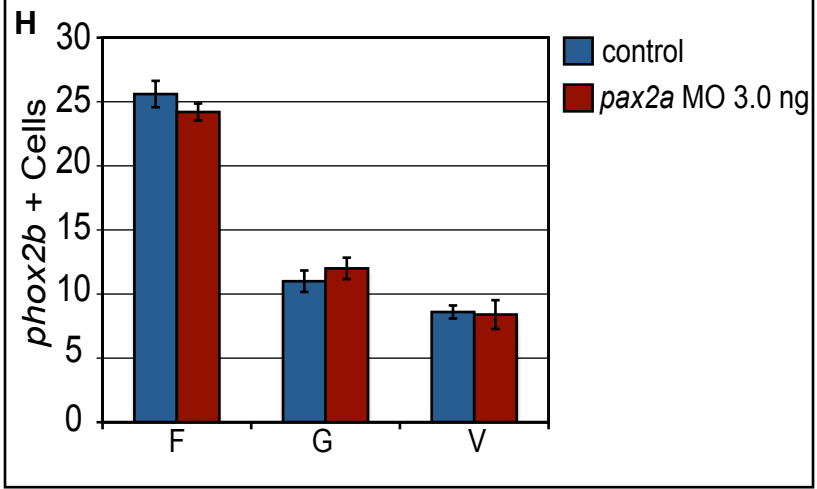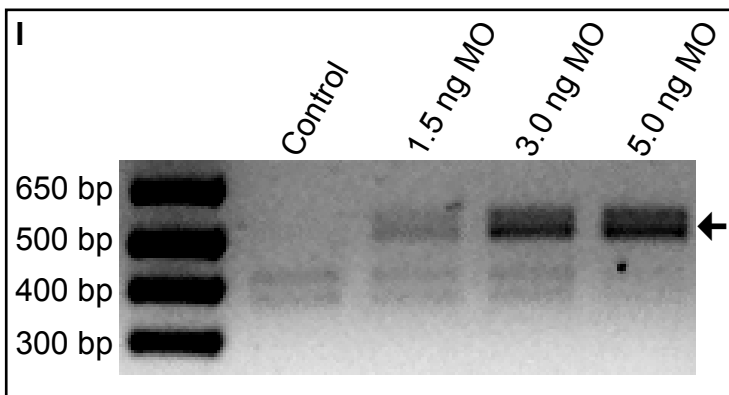

Supplement: supp_139.15.2740_DEV076075-s05.pdf [file supp_139.15.2740_DEV076075-s05.pdf]

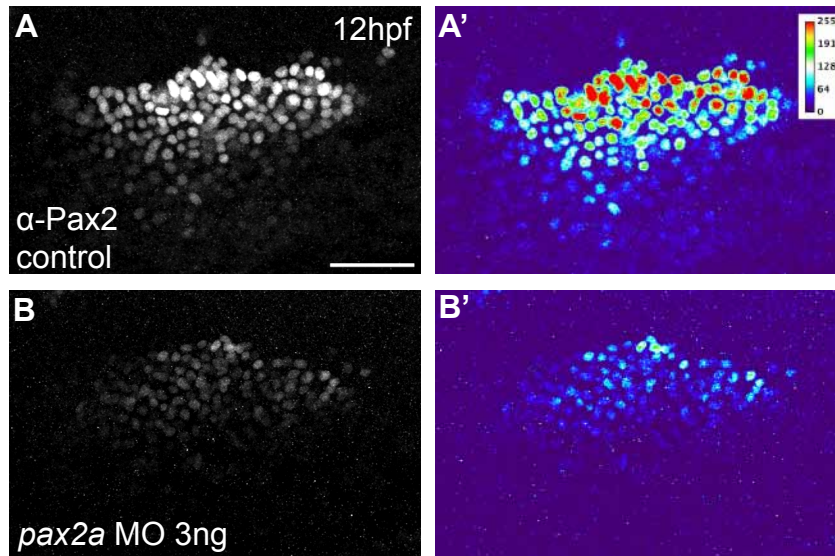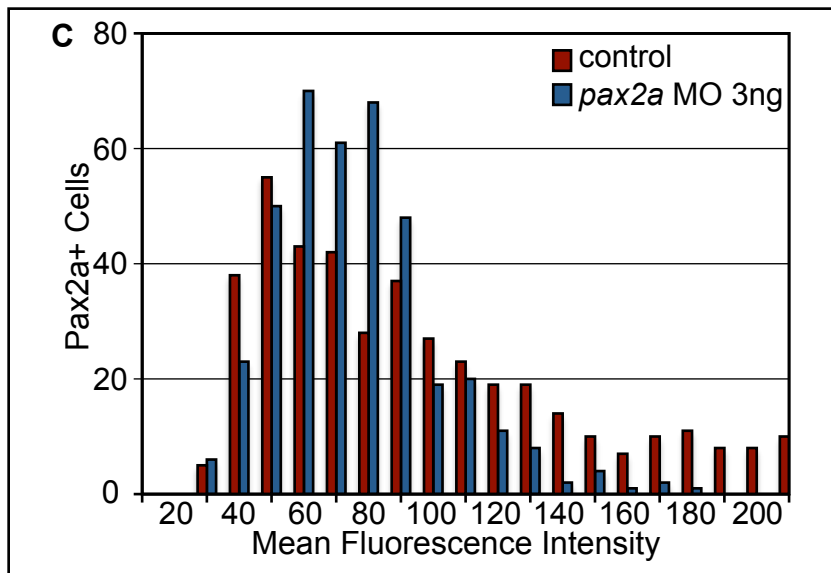

Supplement: supp_139.15.2740_DEV076075-s06.pdf [file supp_139.15.2740_DEV076075-s06.pdf]

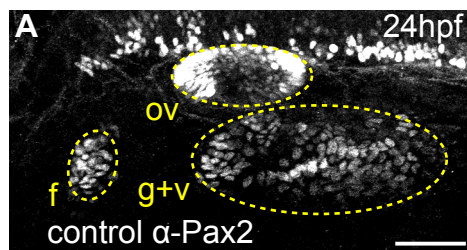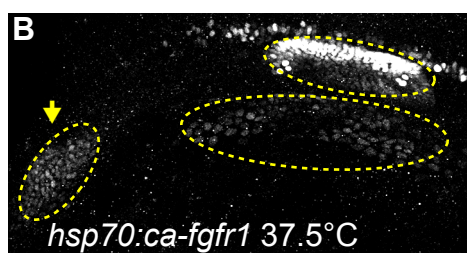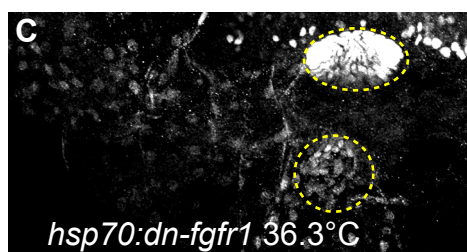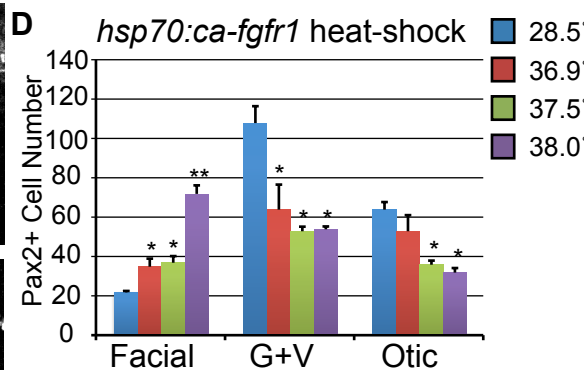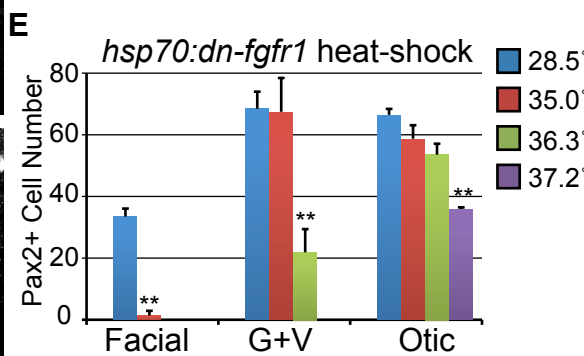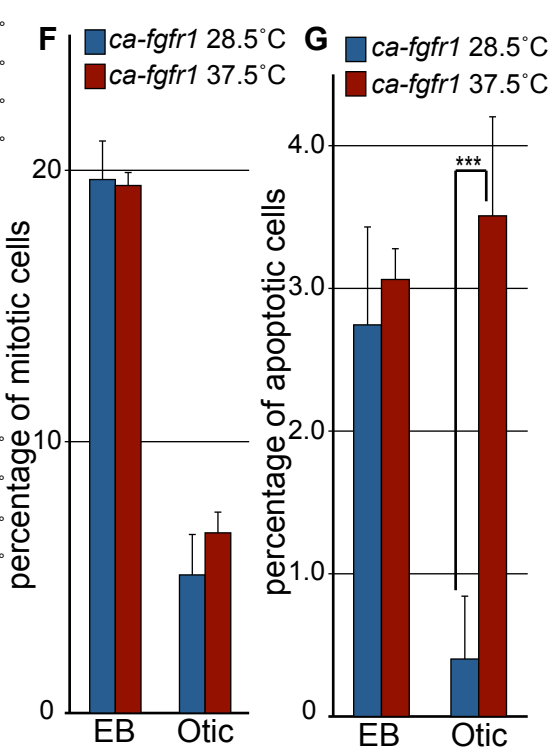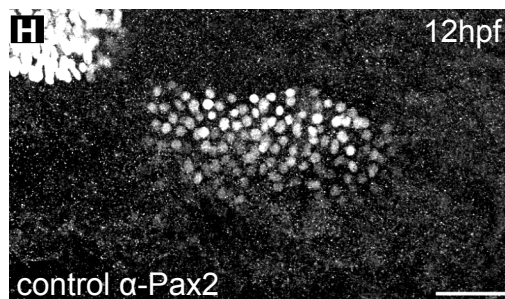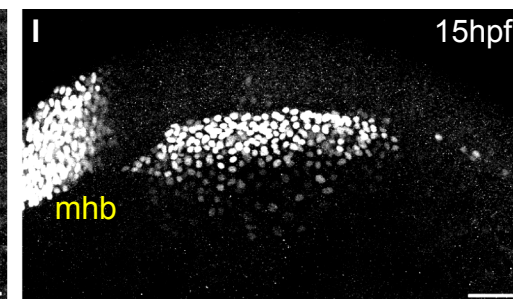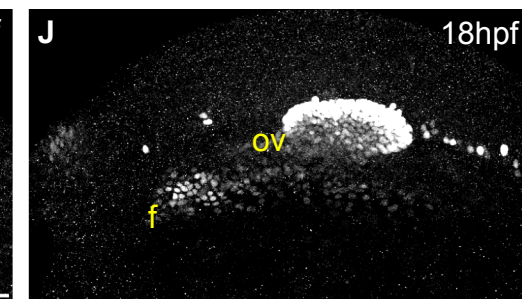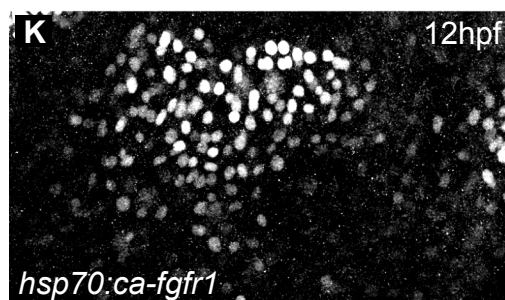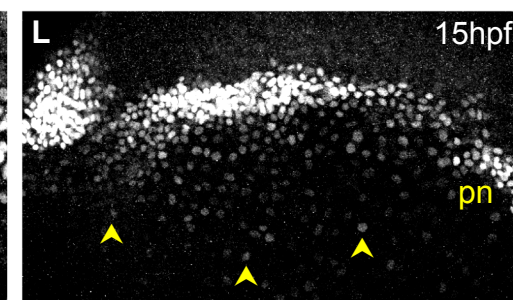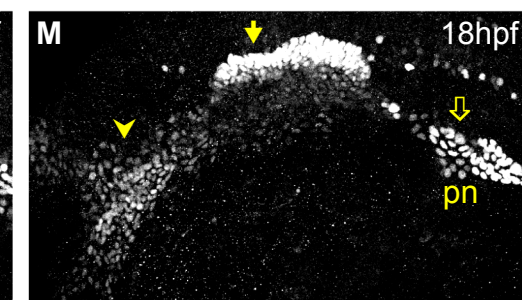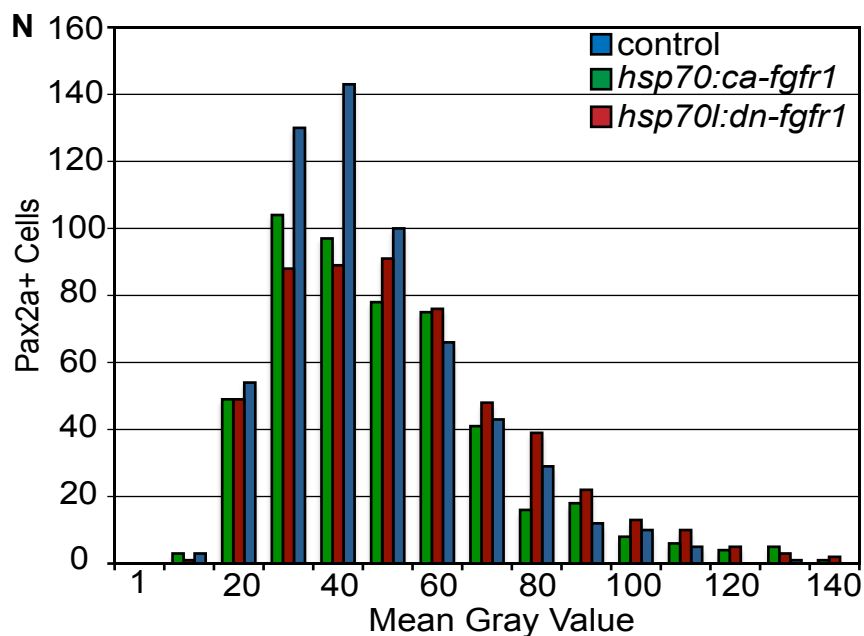

Supplement: supp_139.15.2740_DEV076075-s07.pdf [file supp_139.15.2740_DEV076075-s07.pdf]

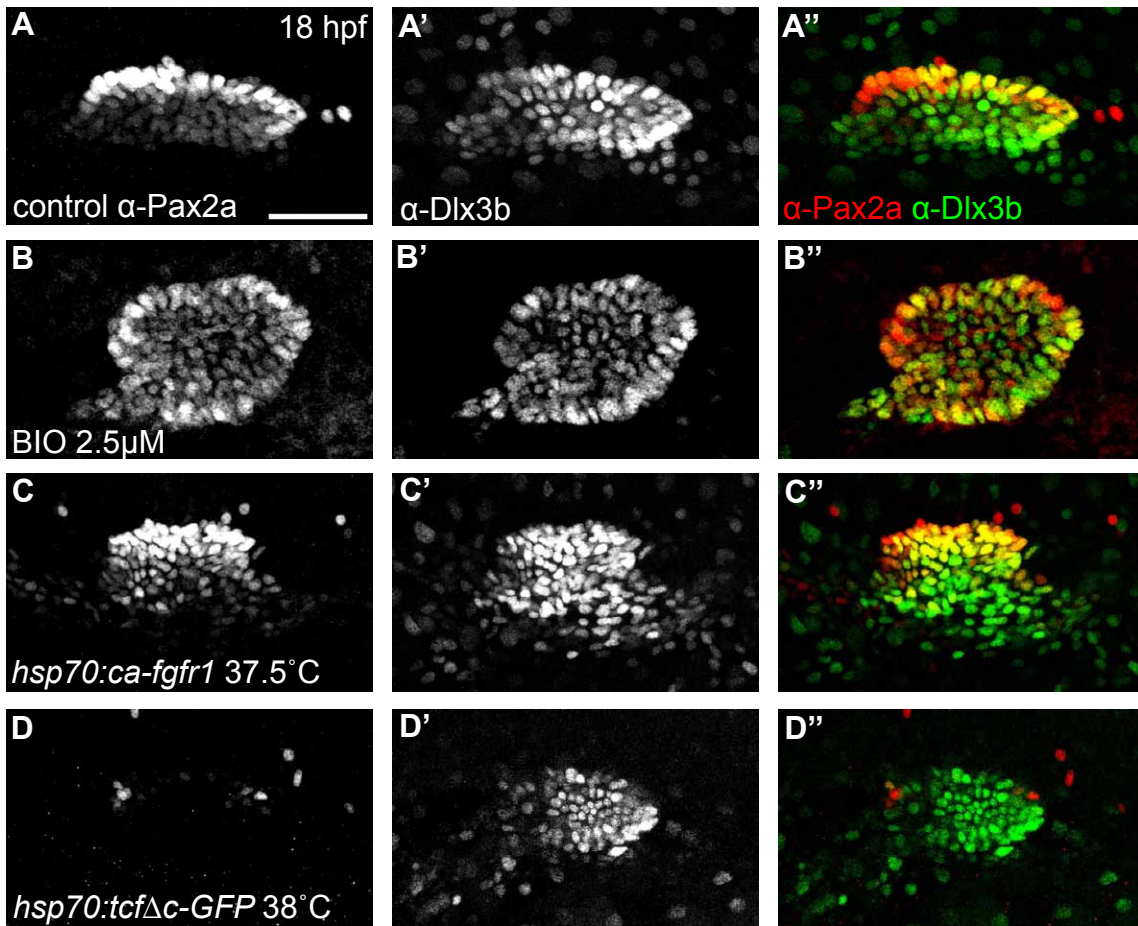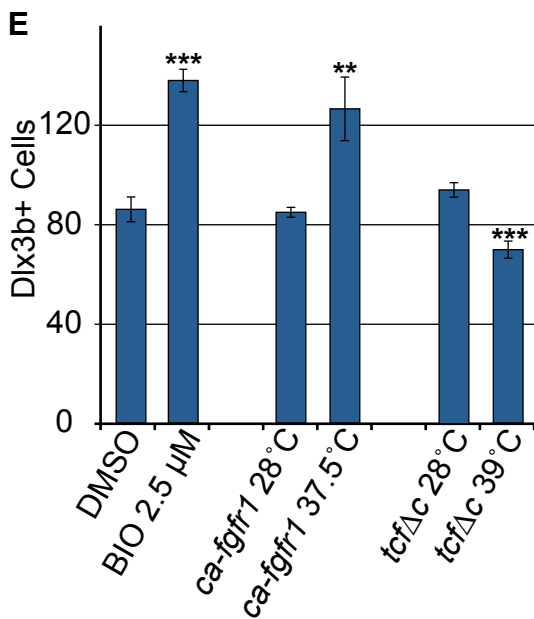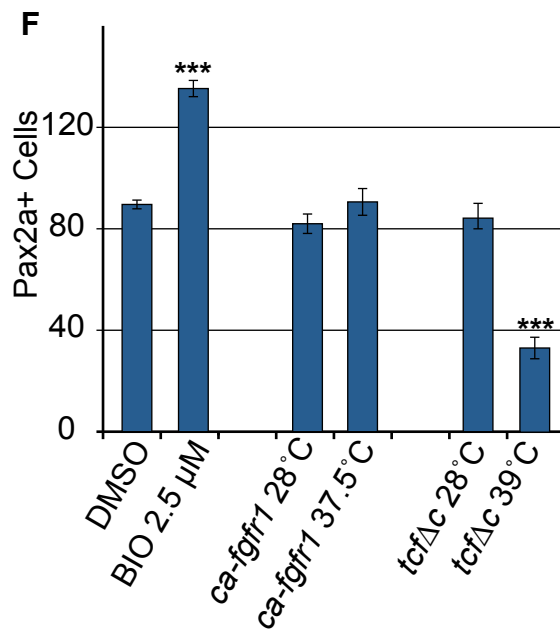

Supplement: supp_139.15.2740_DEV076075-s08.pdf [file supp_139.15.2740_DEV076075-s08.pdf]

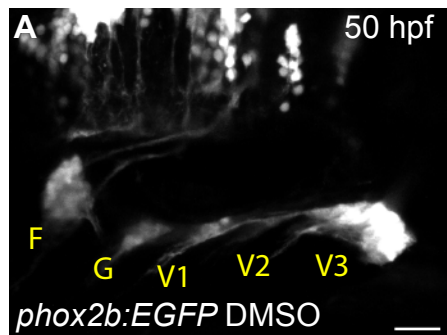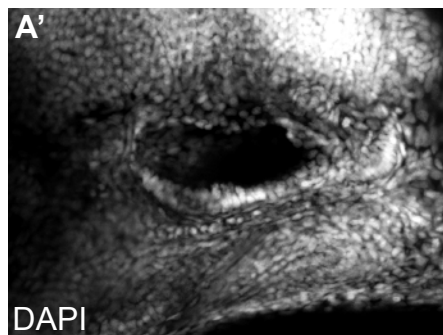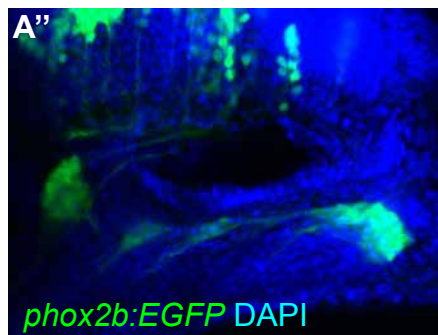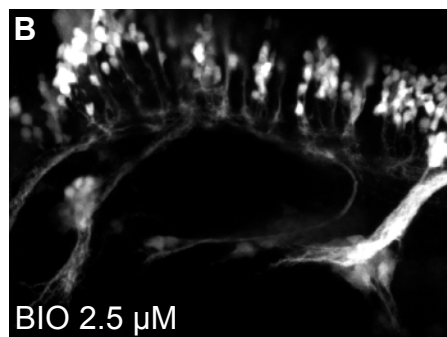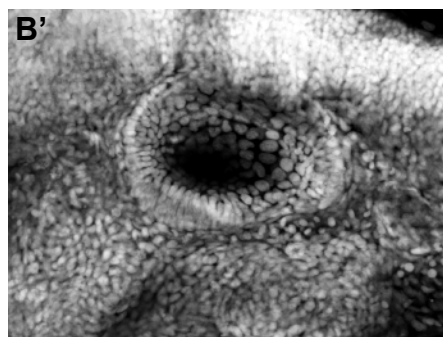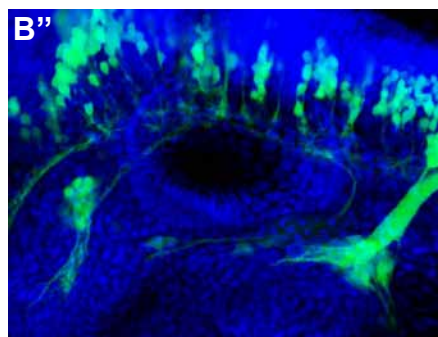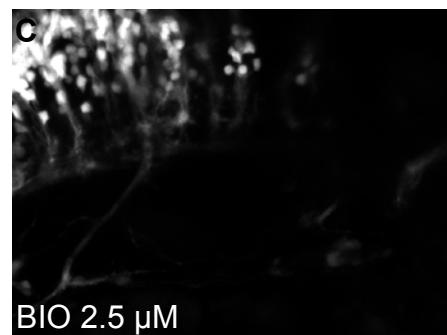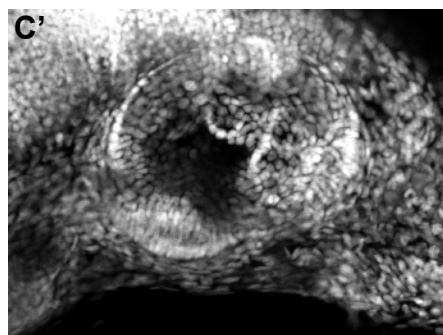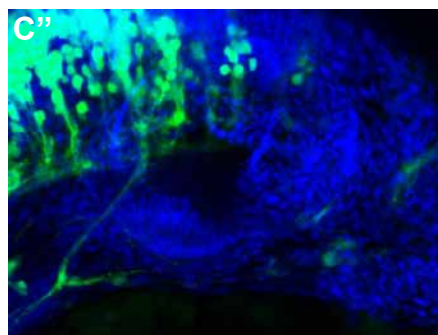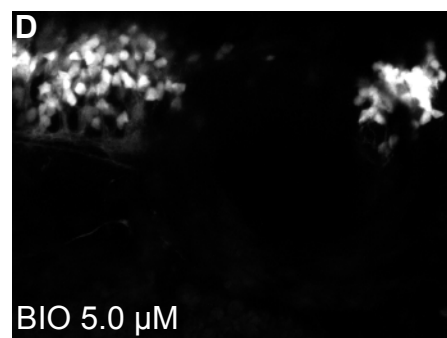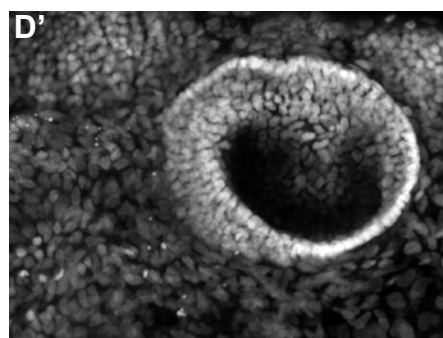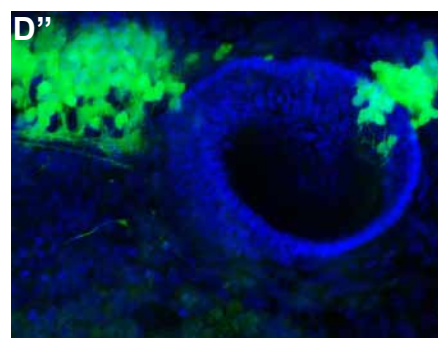

Supplement: supp_139.15.2740_DEV076075-s09.pdf [file supp_139.15.2740_DEV076075-s09.pdf]

DMSO

BIO 2.5 $\mu$ M

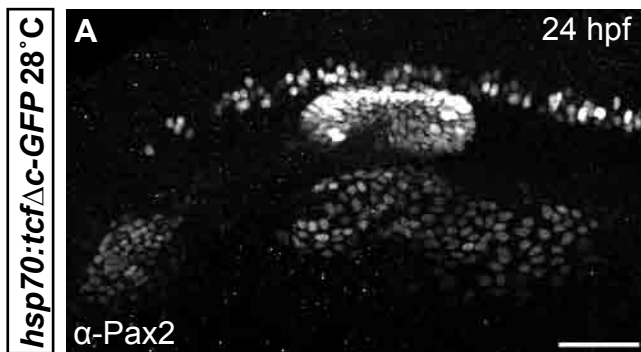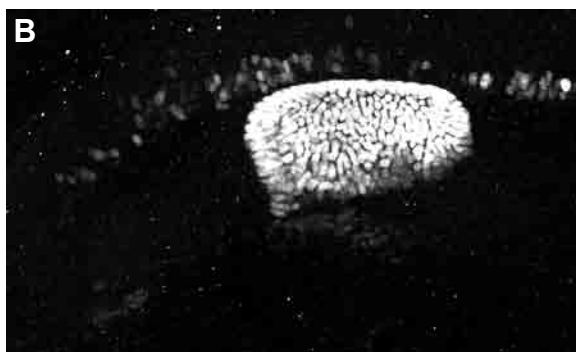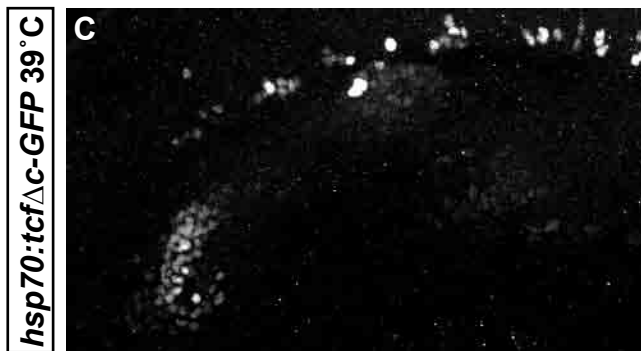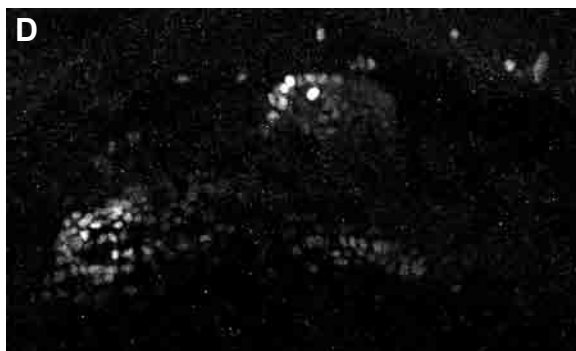

Supplement: supp_139.15.2740_DEV076075-s10.pdf [file supp_139.15.2740_DEV076075-s10.pdf]
